# Supplementary material
Source: PubMed Central journal article supplement (PMC2749569)
Supplement: NIHMS145807-supplement-Supp_Table_1.pdf [file NIHMS145807-supplement-Supp_Table_1.pdf]

Table S1

| residue | mutant amino acid | protein level relative to wild-type <sup>a</sup> | dominance test <sup>b</sup> |                | mixed trimer test in UU1623 |                     |
|---------|-------------------|--------------------------------------------------|-----------------------------|----------------|-----------------------------|---------------------|
|         |                   |                                                  | UU2377 (R69E)               | UU2378 (T156K) | jamming <sup>c</sup>        | rescue <sup>d</sup> |
| K215    | P                 | 0.8                                              | +                           | +              | no                          | no                  |
| S217    | P                 | 1.0                                              | +                           | +              | no                          | R1                  |
| L218    | E                 | 1.4                                              | +                           | +              | no                          | no                  |
|         | K                 | 1.1                                              | +                           | +              | no                          | (R2)                |
|         | N                 | 1.3                                              | +                           | +              | no                          | R2                  |
|         | P                 | 0.9                                              | 0                           | 0              | E1                          | no                  |
| P221    | R                 | 1.1                                              | +                           | +              | no                          | (R2)                |
|         | F                 | 0.9                                              | +                           | +              | E2                          | no                  |
|         | I                 | 0.6                                              | +                           | +              | no                          | R1                  |
|         | L                 | 0.7                                              | +                           | +              | no                          | R1                  |
| M222    | W                 | 0.7                                              | +                           | +              | no                          | R2                  |
|         | D                 | 0.9                                              | +                           | +              | no                          | no                  |
|         | E                 | 1.0                                              | +                           | +              | no                          | no                  |
|         | N                 | 1.3                                              | +                           | +              | no                          | no                  |
|         | P                 | 1.3                                              | +                           | +              | no                          | no                  |
|         | Q                 | 1.4                                              | +                           | +              | E1                          | no                  |
| L225    | R                 | 1.1                                              | 0                           | 0              | E1                          | no                  |
|         | C                 | 1.5                                              | +                           | +              | no                          | R2                  |
|         | D                 | 1.5                                              | +                           | +              | no                          | no                  |
|         | G                 | 1.0                                              | +                           | +              | no                          | (R2)                |
|         | K                 | 1.0                                              | +                           | +              | no                          | no                  |
|         | P                 | 0.9                                              | 0                           | 0              | no                          | no                  |
|         | Q                 | 1.9                                              | +                           | +              | no                          | R2                  |
| I226    | R                 | 1.4                                              | +                           | +              | no                          | (R1)                |
|         | S                 | 2.0                                              | +                           | +              | no                          | R2                  |
|         | P                 | 0.9                                              | +                           | +              | no                          | no                  |
|         | D227              | M                                                | 0.2                         | ND             | ND                          | no                  |
| S228    | P                 | 0.1                                              | ND                          | ND             | no                          | no                  |
|         | P                 | 0.7                                              | +                           | +              | no                          | R2                  |
| I229    | A                 | 1.0                                              | +                           | +              | E1                          | (R2)                |
|         | D                 | 1.0                                              | 0                           | 0              | no                          | no                  |
|         | E                 | 0.6                                              | +                           | +              | no                          | no                  |
|         | P                 | 0.9                                              | +                           | +              | no                          | no                  |
|         | R                 | 1.1                                              | 0                           | 0              | no                          | no                  |
|         | S                 | 0.8                                              | +                           | +              | E1                          | R2                  |
| I232    | D                 | 2.1                                              | 0                           | 0              | no                          | no                  |

## Supporting Information - Zhou *et al.*

|      |   |     |   |   |    |      |
|------|---|-----|---|---|----|------|
|      | E | 1.1 | + | + | no | no   |
|      | G | 1.6 | + | + | no | no   |
|      | H | 1.4 | + | + | no | (R2) |
|      | K | 1.6 | + | + | no | no   |
|      | N | 0.8 | + | + | no | no   |
|      | P | 0.9 | + | + | E1 | no   |
|      | R | 2.0 | + | + | no | no   |
|      | S | 1.6 | + | + | no | (R2) |
| A233 | C | 0.9 | + | + | no | R2   |
|      | F | 0.7 | + | + | no | R2   |
|      | I | 0.9 | + | + | no | R2   |
|      | L | 0.9 | + | + | E2 | no   |
|      | N | 0.7 | + | + | E1 | no   |
|      | P | 1.0 | + | + | no | R1   |
|      | V | 0.7 | + | + | E1 | no   |
| E248 | G | 0.8 | + | + | no | R2   |
|      | H | 1.1 | + | + | no | R2   |
|      | I | 0.9 | + | + | no | R1   |
|      | K | 1.1 | + | + | E1 | no   |
|      | L | 1.0 | + | + | E2 | no   |
|      | M | 0.8 | + | + | E2 | no   |
|      | N | 0.8 | + | + | no | R1   |
|      | P | 0.8 | + | + | no | R2   |
|      | Q | 1.0 | + | + | no | R2   |
|      | R | 1.4 | + | + | E1 | no   |
|      | T | 1.1 | + | + | no | R2   |
|      | V | 1.1 | + | + | no | R1   |
| M249 | D | 0.6 | + | + | no | no   |
|      | E | 0.7 | + | + | no | no   |
|      | G | 0.8 | + | + | no | (R2) |
|      | K | 1.0 | + | + | no | no   |
|      | Q | 1.3 | + | + | no | (R2) |
|      | R | 1.0 | + | + | no | no   |
| G250 | P | 1.0 | + | + | E1 | no   |
|      | W | 0.8 | + | + | no | R3   |
| Q251 | P | 1.1 | + | + | no | R1   |
| L252 | E | 0.7 | 0 | 0 | no | no   |
|      | H | 0.5 | + | + | no | no   |
|      | K | 1.5 | 0 | 0 | E1 | no   |
|      | N | 0.9 | 0 | 0 | no | no   |
|      | P | 0.6 | + | + | no | no   |

### Supporting Information - Zhou *et al.*

|      |   |     |   |   |    |      |
|------|---|-----|---|---|----|------|
|      | R | 0.9 | 0 | 0 | no | no   |
|      | S | 1.0 | + | + | no | no   |
| A253 | D | 1.0 | + | + | no | no   |
|      | I | 0.6 | + | + | no | no   |
|      | K | 0.8 | + | + | no | (R1) |
|      | P | 1.0 | + | + | E1 | no   |
|      | R | 1.1 | + | + | no | R1   |
| E254 | P | 0.8 | + | + | no | no   |
| S255 | L | 1.0 | + | + | E1 | R1   |
|      | P | 1.2 | + | + | no | (R2) |
| L256 | A | 0.7 | + | + | E1 | (R2) |
|      | E | 1.0 | 0 | 0 | E3 | no   |
|      | G | 2.0 | + | + | E3 | no   |
|      | K | 1.0 | 0 | 0 | no | no   |
|      | N | 1.9 | 0 | 0 | no | no   |
|      | P | 1.7 | 0 | 0 | E3 | no   |
|      | Q | 0.7 | 0 | 0 | E3 | no   |
|      | R | 0.7 | 0 | 0 | E3 | no   |
|      | S | 0.6 | + | + | E3 | no   |
|      | T | 0.6 | + | + | E1 | (R2) |
|      | Y | 1.0 | + | + | E2 | (R2) |
| R257 | P | 0.9 | 0 | 0 | E1 | no   |
| H258 | P | 1.2 | 0 | 0 | E1 | no   |
| M259 | D | 1.1 | 0 | 0 | no | no   |
|      | E | 1.0 | 0 | 0 | no | no   |
|      | F | 2.6 | + | + | E1 | (R2) |
|      | H | 1.1 | + | + | E3 | no   |
|      | I | 0.8 | 0 | 0 | E3 | no   |
|      | K | 1.8 | + | + | E3 | no   |
|      | P | 1.1 | + | + | E1 | no   |
|      | Q | 1.1 | + | + | no | (R2) |
|      | R | 0.8 | 0 | 0 | E3 | no   |
|      | T | 0.8 | + | + | E3 | (R2) |
|      | V | 0.9 | 0 | 0 | E3 | no   |
| Q260 | D | 0.6 | + | + | E1 | no   |
|      | F | 0.8 | ± | + | no | R1   |
|      | P | 0.7 | 0 | 0 | E1 | no   |
| G261 | P | 0.6 | 0 | 0 | E1 | no   |
| E262 | I | 0.8 | ± | + | E2 | R2   |
|      | L | 1.0 | 0 | 0 | E2 | R2   |
|      | P | 0.8 | + | + | E1 | R2   |

## Supporting Information - Zhou *et al.*

|      |   |     |    |    |    |      |
|------|---|-----|----|----|----|------|
| L263 | A | 0.7 | +  | +  | E1 | (R2) |
|      | C | 0.6 | +  | +  | E1 | (R2) |
|      | E | 0.9 | 0  | 0  | E3 | no   |
|      | G | 1.0 | +  | +  | E3 | no   |
|      | N | 0.9 | +  | +  | no | no   |
|      | P | 0.8 | 0  | 0  | E3 | no   |
|      | R | 0.8 | 0  | 0  | E3 | no   |
|      | S | 0.7 | +  | +  | E3 | no   |
|      | T | 0.8 | +  | +  | E1 | (R2) |
|      | Y | 0.8 | +  | +  | no | R2   |
| M264 | P | 0.9 | 0  | 0  | E1 | no   |
|      | Y | 0.0 | ND | ND | no | no   |
| R265 | P | 1.0 | +  | +  | E1 | no   |

<sup>a</sup> Values are rounded to one decimal place.

<sup>b</sup> Results of complementation tests between plasmid-borne *tsr*-HAMP null mutations and strains with a recessive *tsr* serine-binding lesion (R69E or T156K); 0 = no complementation ( $Tsr^-$ ); + = complementation ( $Tsr^+$ ); ND = not done due to low expression level of mutant protein.

<sup>c</sup> Results of Tar function tests in UU1623 ( $\Delta tsr tar^+$ ) cells carrying plasmid-borne *tsr*-HAMP null mutations. Tar-jamming effects, if any, were classified from least to most severe on a scale (E1-E3) based on the level of  $Tsr^*$  expression needed for the effect (Ames *et al.*, 2002).

<sup>d</sup> Results of Tsr function tests in UU1623 ( $\Delta tsr tar^+$ ) cells carrying plasmid-borne *tsr*-HAMP null mutations. Rescue of Tsr function, if any, was classified from least to most effective on a scale (R1-R3) based on the level of  $Tsr^*$  expression needed for the effect (Ames *et al.*, 2002). Rescue effects shown in parentheses occurred at 30°C, but not at 32.5°C.
